# Supplementary material for: Giant piezoelectric properties of the [110]-oriented PZT-5H single crystals grown by solid state crystal growth
Source: Royal Society of Chemistry journal article supplement (doi:10.1039/d2tc03986a), 2023-01-01
Supplement: d2tc03986a1.pdf [file d2tc03986a1.pdf]

Supporting information for

Giant piezoelectric properties in [110]-oriented PZT-  
5H single crystal grown by solid state crystal growth

*Honghui Wang, Ming Ma, Song Xia, Nan Zhang, Zhenrong Li\**

Electronic Materials Research Laboratory, Key Laboratory of the Ministry of Education &  
International Center for Dielectric Research, School of Electronic Science and Engineering,  
Faculty of Electronic and Information Engineering,  
Xi'an Jiaotong University, Xi'an 710049, China

**Corresponding Author**

\* E-mail: zhrli@mail.xjtu.edu.cn (Z.R.L.)

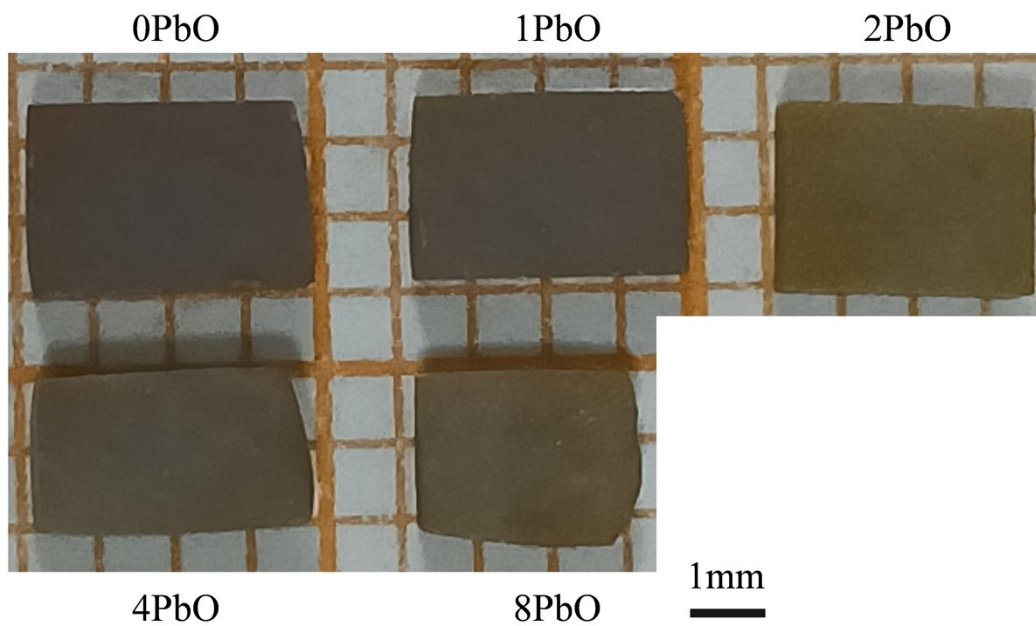

**Fig. S1** The pictures for [110]-oriented PZT-5H single crystals grown with different excess PbO addition.

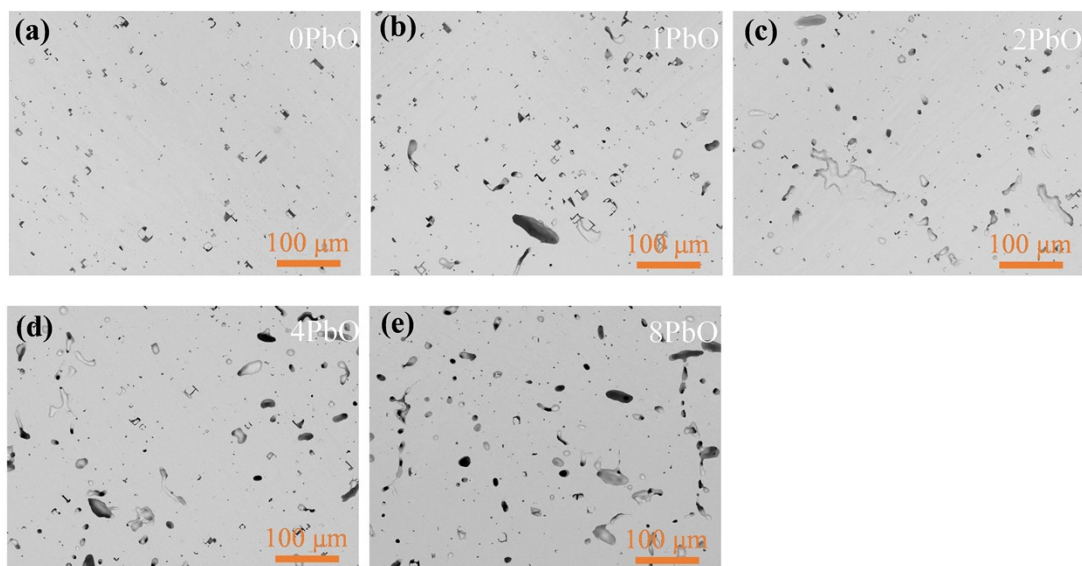

**Fig. S2** SEM micrographs of cross section of [110]-oriented PZT-5H single crystals grown with different excess PbO addition.

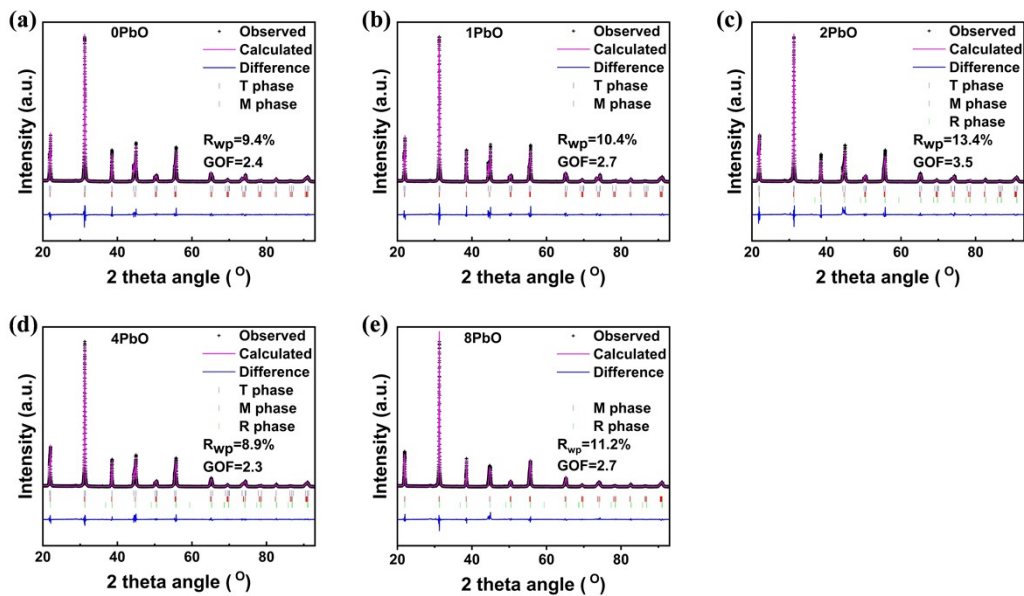

**Fig. S3** Rietveld refinement patterns for powder of PZT-5H single crystals grown with different excess PbO addition.

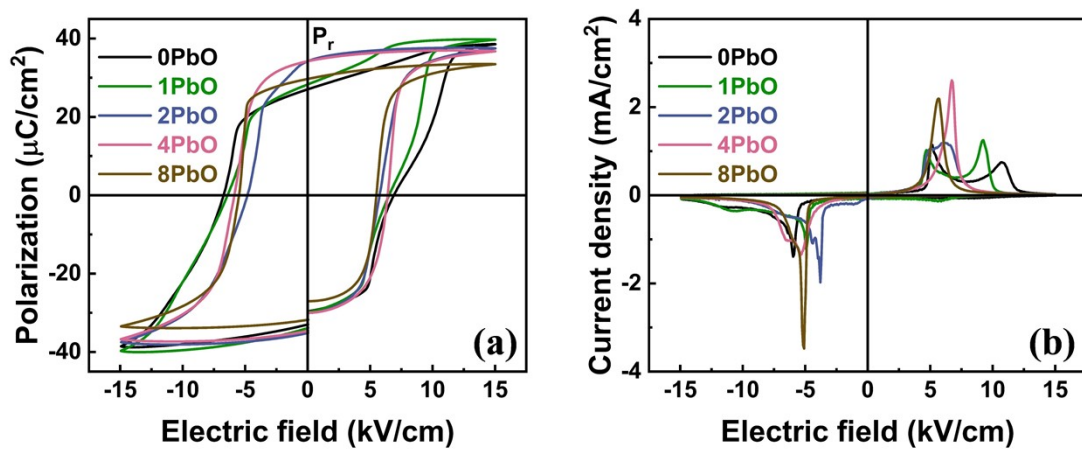

**Fig. S4** a) Polarization hysteresis P-E loops and b) current density J-E curves for [110]-oriented PZT-5H single crystals grown with different excess PbO addition.
